# Supplementary material for: miR-199a-3p suppresses cervical epithelial cell inflammation by inhibiting the HMGB1/TLR4/NF-κB pathway in preterm birth
Source: PubMed Central journal article supplement — Mol Med Rep. 2020 May 22;22(2):926–38. doi: 10.3892/mmr.2020.11184 (PMC7339783; doi:10.3892/mmr.2020.11184), 2020-05-22
Supplement: Supplementary_Data.pdf [file Supplementary_Data.pdf]

Figure S1. Proof of transfection. (A) Transfection efficiency of (A) miR-199a-3p mimics and (B) pcDNA-HMGB1 in Ecto and Endo cells. (C) Transfection efficiency of miR-199a-3p mimics in mice. (D) Transfection efficiency of pcDNA-TLR4 in Ecto and Endo cells. (E) Transfection efficiency of pcDNA-HMGB1 in mice. \*\* $P < 0.01$ . miR, microRNA; HMGB1, high-mobility group box 1 protein; TLR4, toll-like receptor 4; Ecto, ectocervical; Endo, endocervical; WT, wild type; NC, negative control.

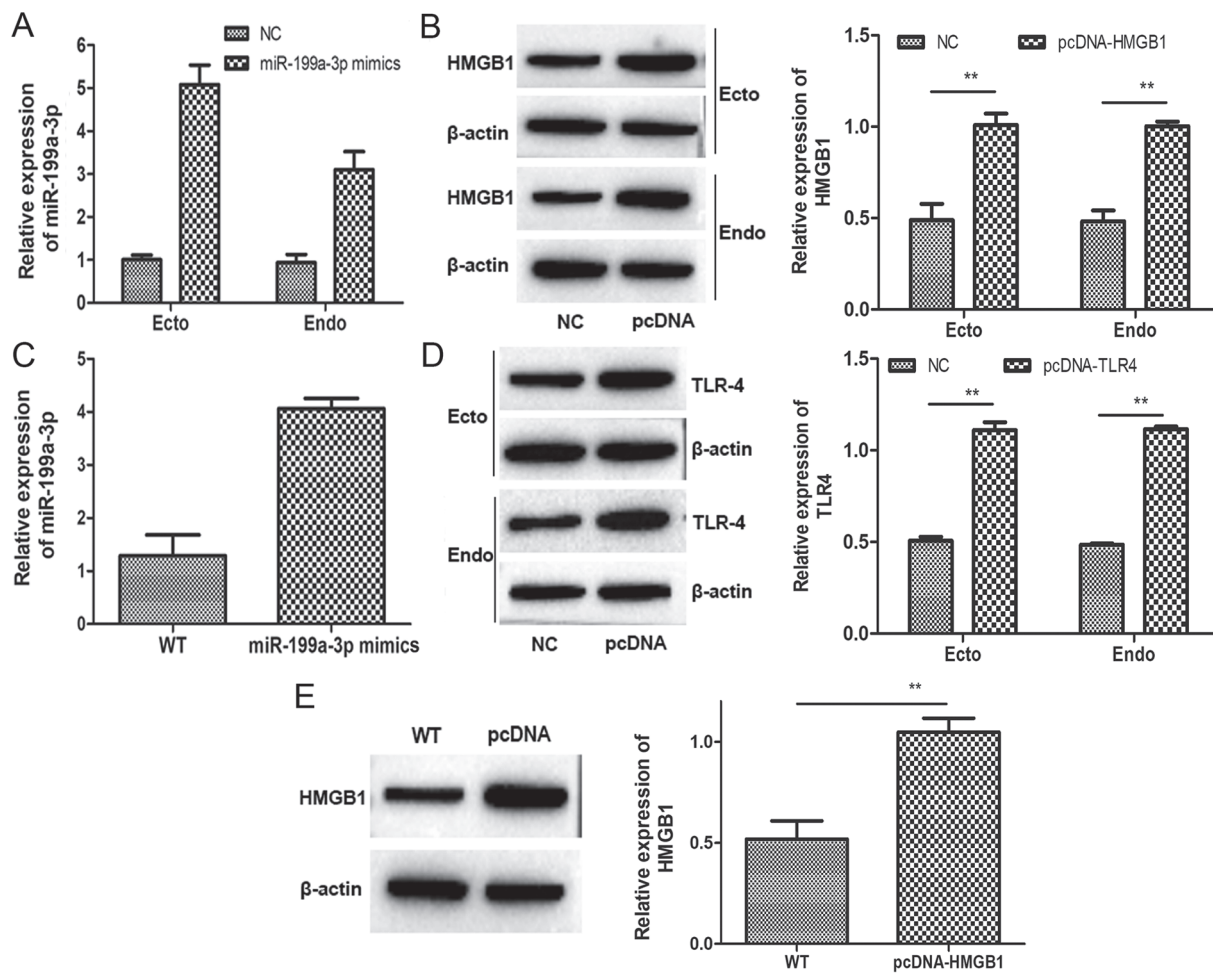

Table S1. Baseline characteristics of the participants.

| Patient characteristics                                        | PTB (n=52)          | PPROM (n=60)         | TB (n=70)              | P-value |
|----------------------------------------------------------------|---------------------|----------------------|------------------------|---------|
| Maternal age, years, median (IOR) <sup>a</sup>                 | 31.19 (19-46)       | 30.55 (22-41)        | 31.94 (22-41)          | NS      |
| Maternal weight, kg, median (IOR) <sup>a</sup>                 | 67.52 (50-88)       | 68.74 (53-90)        | 70.06 (56-94)          | NS      |
| Body mass index, kg/m <sup>2</sup> , median (IOR) <sup>a</sup> | 24.16 (19.43-34.15) | 25.71 (20.17-35.46)  | 27.09 (20.55-37.78)    | NS      |
| Primiparity, n (%) <sup>b</sup>                                | 43 (82.69)          | 54 (90)              | 63 (90)                | NS      |
| Gestational age at delivery, weeks, median (IOR) <sup>a</sup>  | 34.44 (28-36)       | 33.98 (28-36)        | 39.11 (37-41.3)        | NS      |
| Birth weight, g, median (IOR) <sup>a</sup>                     | 1,514.5 (770-1,910) | 1,923.33 (900-2,350) | 3,177.86 (2,250-4,050) | NS      |
| Cesarean section, n (%) <sup>b</sup>                           | 28 (53.85)          | 37 (61.67)           | 47 (67.14)             | NS      |

<sup>a</sup>Kruskal-Wallis test. <sup>b</sup>Fisher's Exact test. PTB, preterm birth without preterm premature rupture of membranes; PPROM, preterm premature rupture of membranes; TB, term birth; IOR, interquartile range; NS, non-significant.
